# Supplementary material for: Cardiovascular magnetic resonance pulmonary perfusion for guidance of interventional treatment of pulmonary vein stenosis
Source: Springer Nature journal article supplement (doi:10.1186/s12968-022-00904-x), 2022-01-01

preintervention

postintervention

Case #1

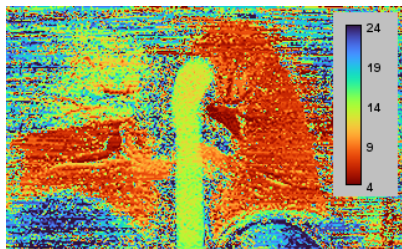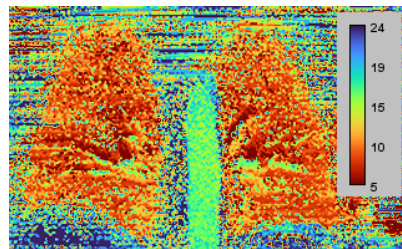

Case #2

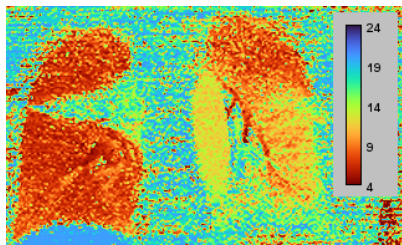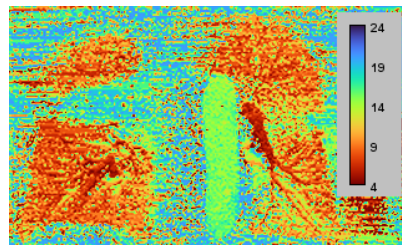

Case #3

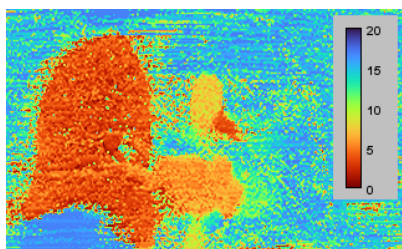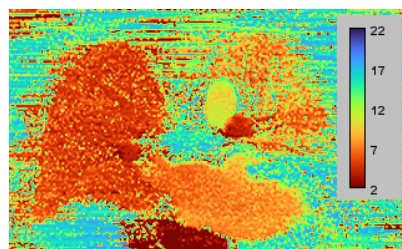

Case #4

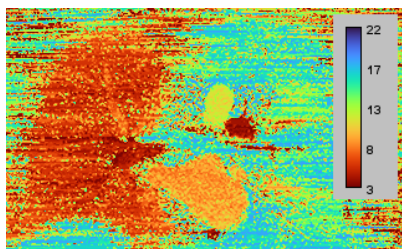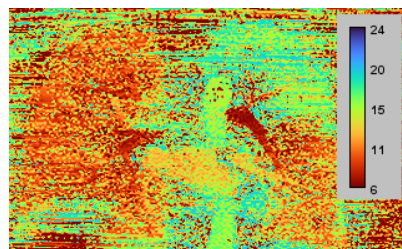

Case #5

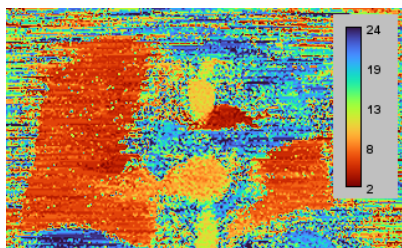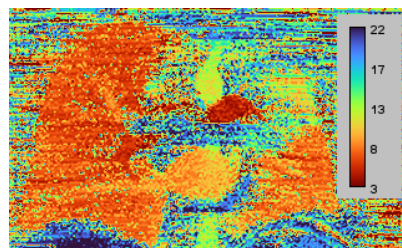

Case #6

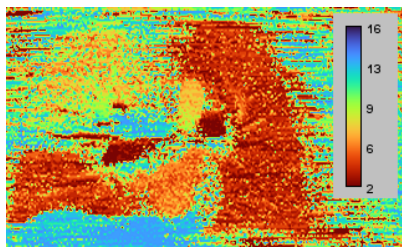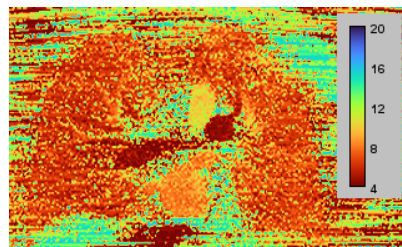

Case #7

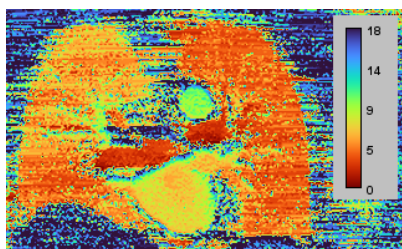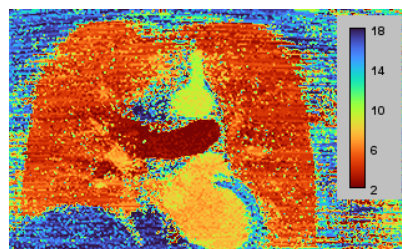

preintervention

postintervention

Case #8

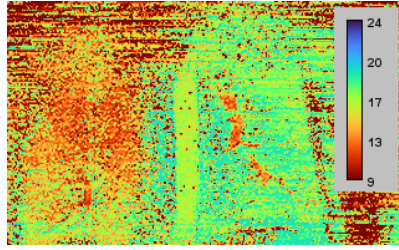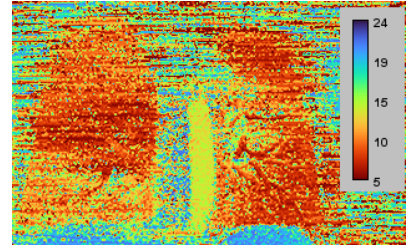

Case #9

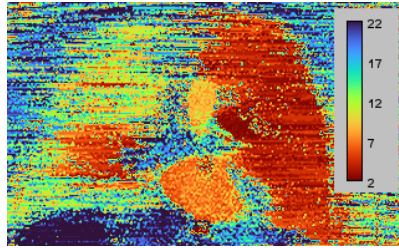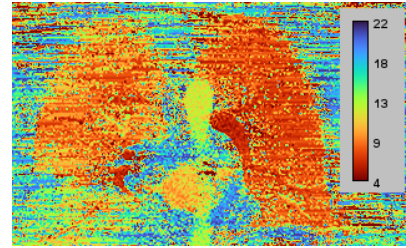

Case #10

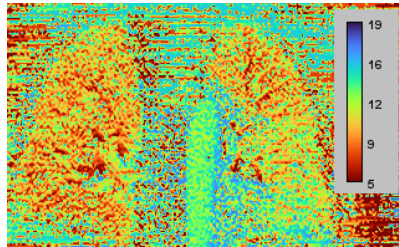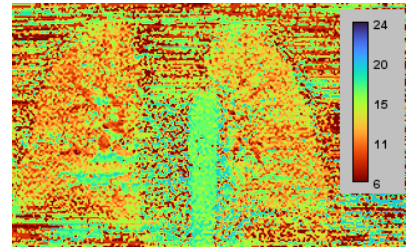

Case #11

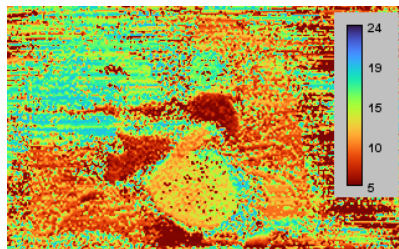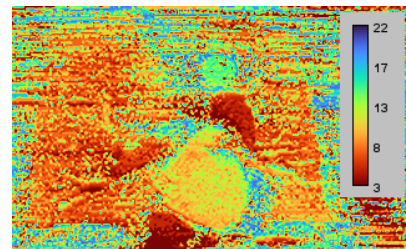

Case #12

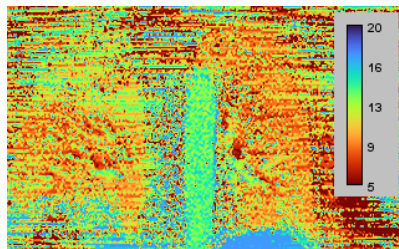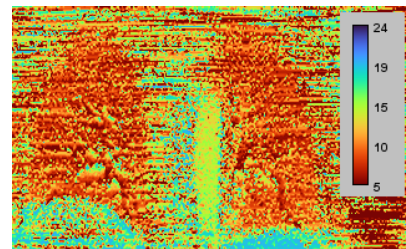

Case #13

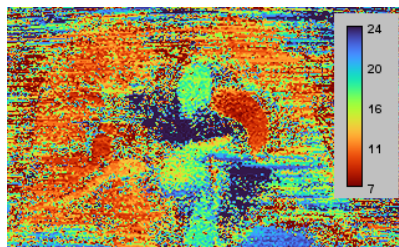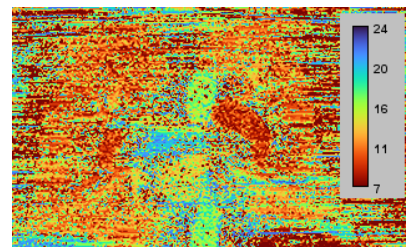

Case #14

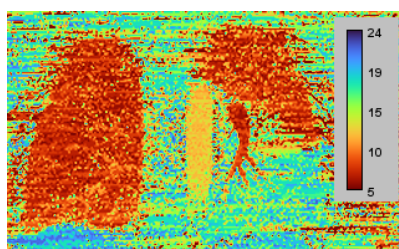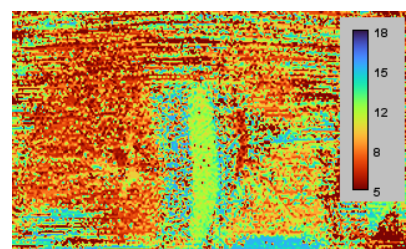

preintervention

postintervention

Case #15

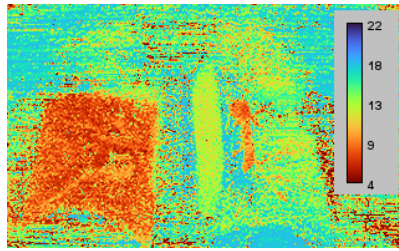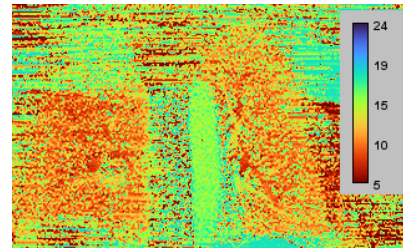

Case #16

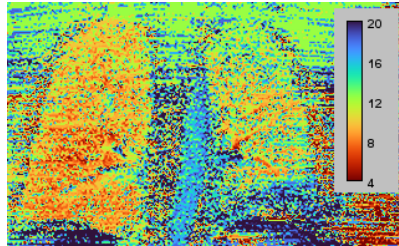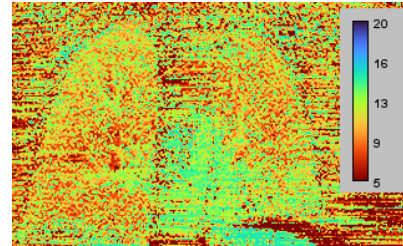

Case #17

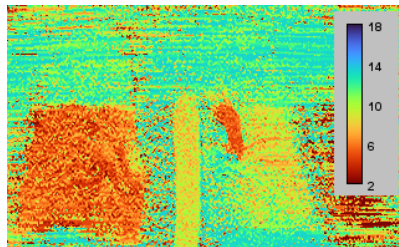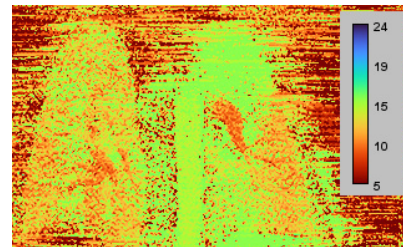

Case #18

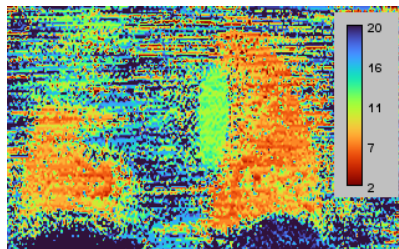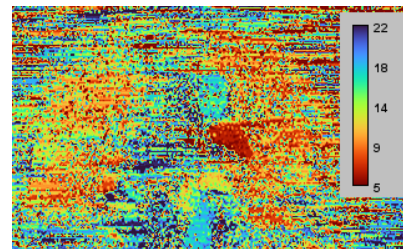

Case #19

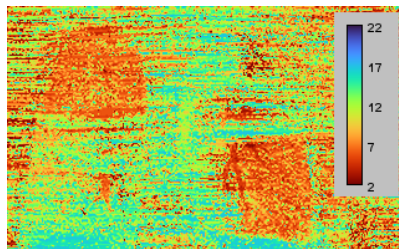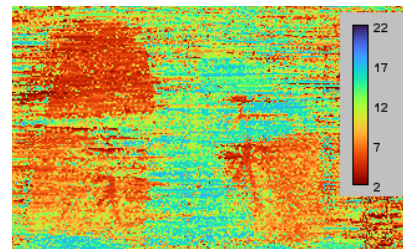

Case #20

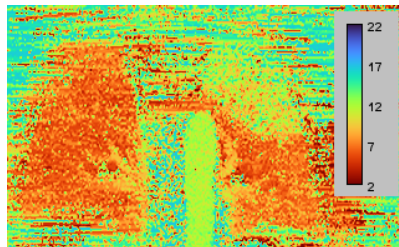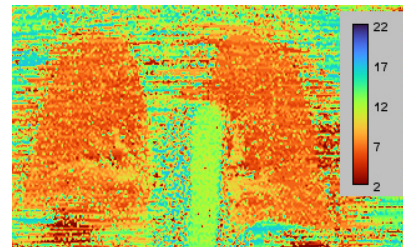

Case #21

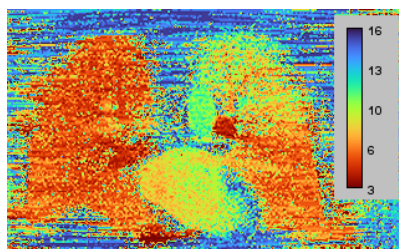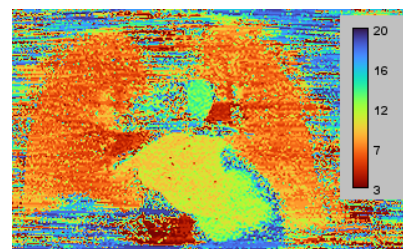

preintervention

postintervention

Case #22

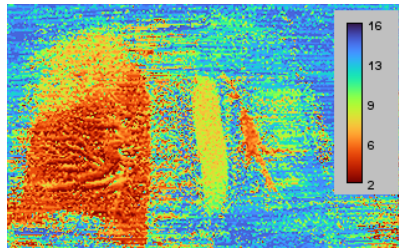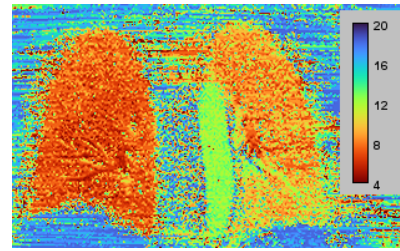

Case #23

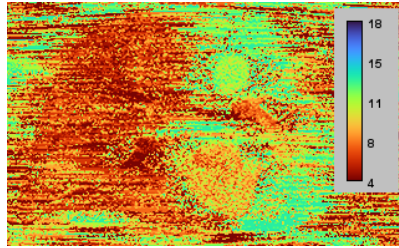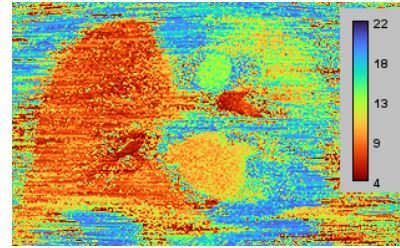

Case #24

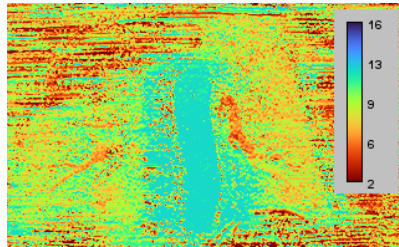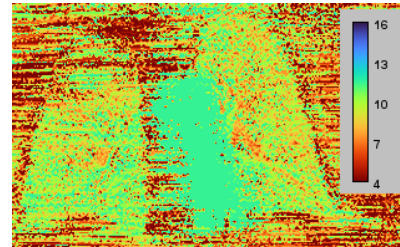

Case #25

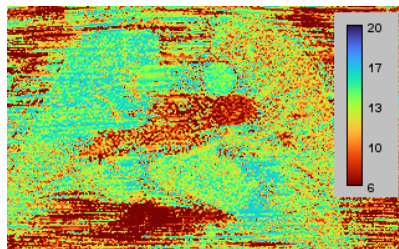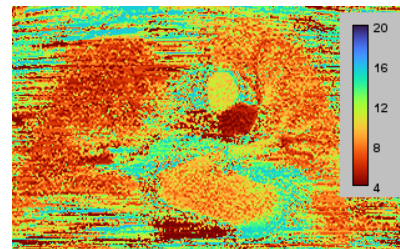

Case #26

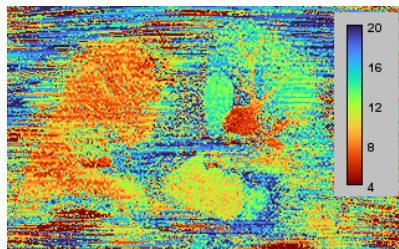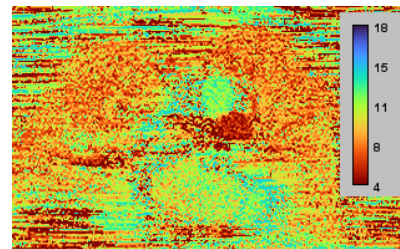

Case #27

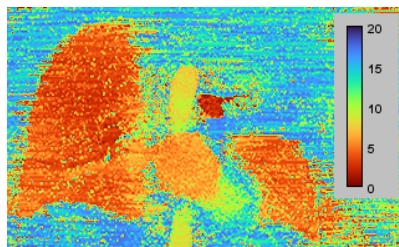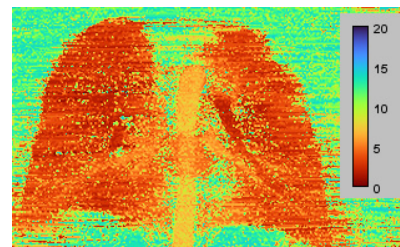

Supplement: MOESM4 [file 23816282]
